# Supplementary material for: Identification of a DNA Methylation Episignature in the 22q11.2 Deletion Syndrome
Source: MDPI journal article supplement (doi:10.3390/ijms22168611), 2021-08-10

## Supplementary Figure 3: Leave-1-out cross validation results

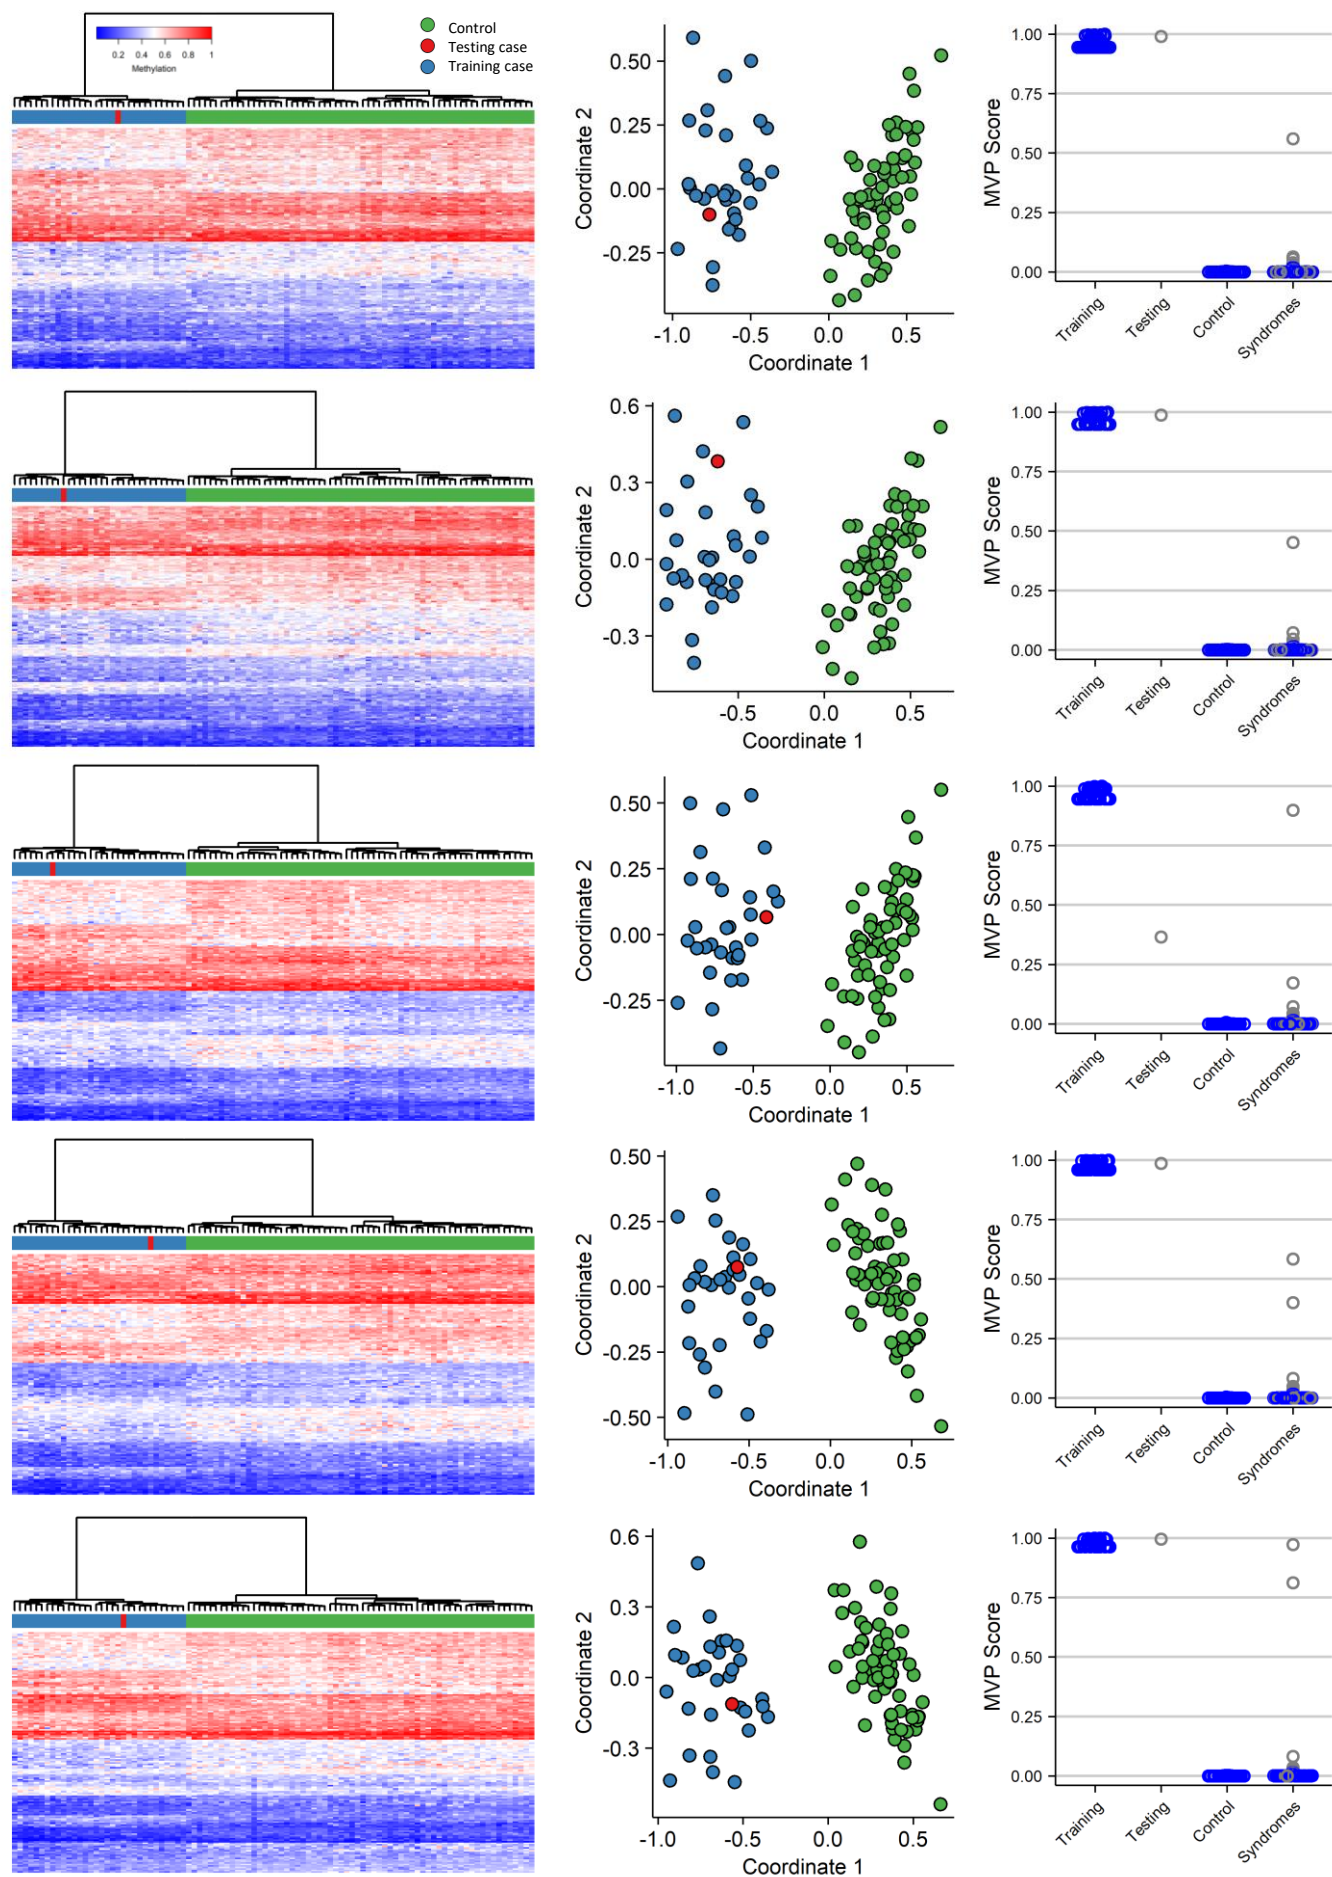

## Supplementary Figure 3: Leave-1-out cross validation results

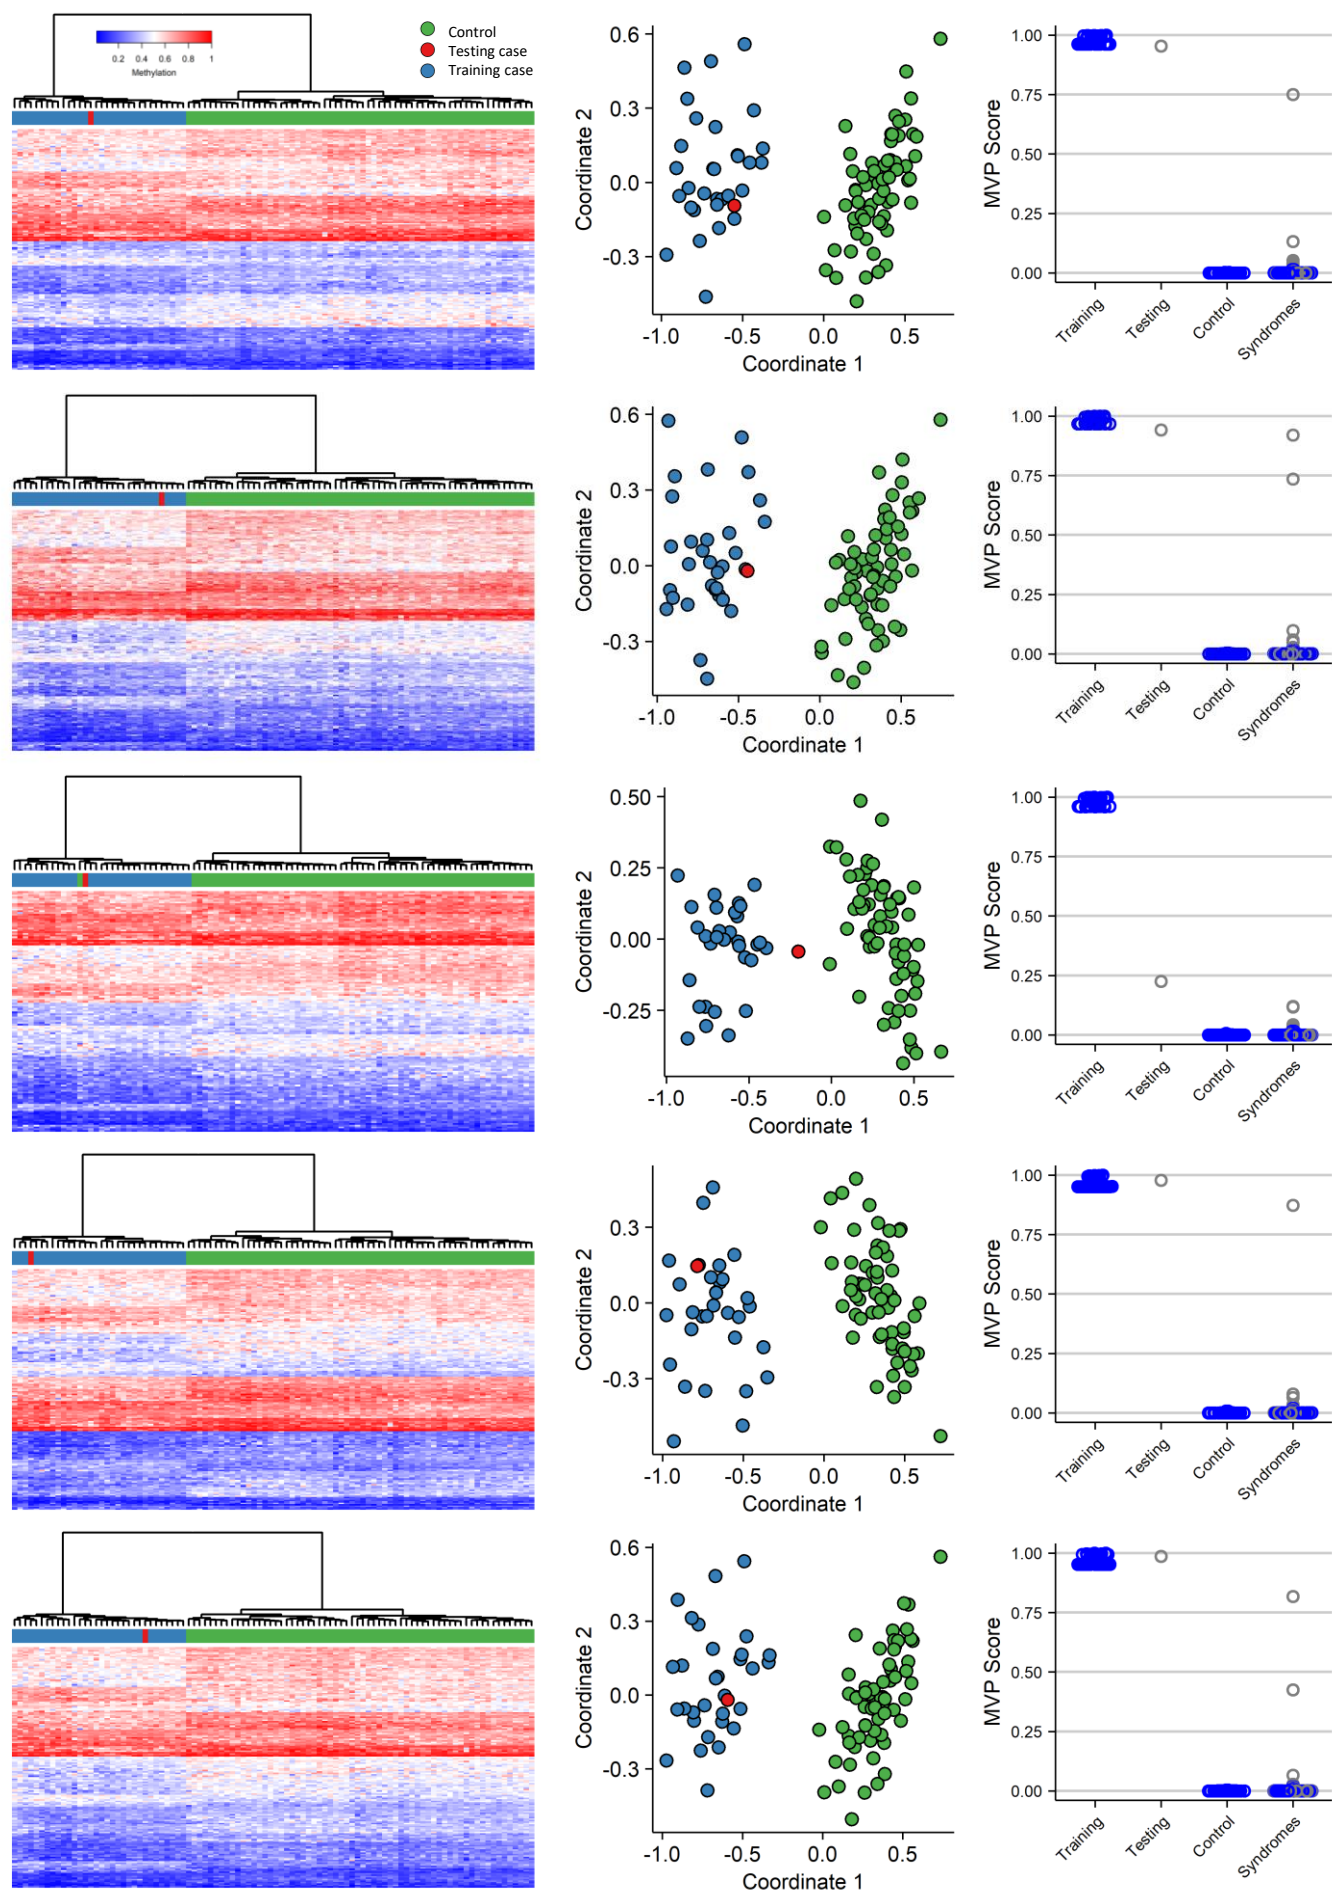

Supplementary Figure 3: Leave-1-out cross validation results

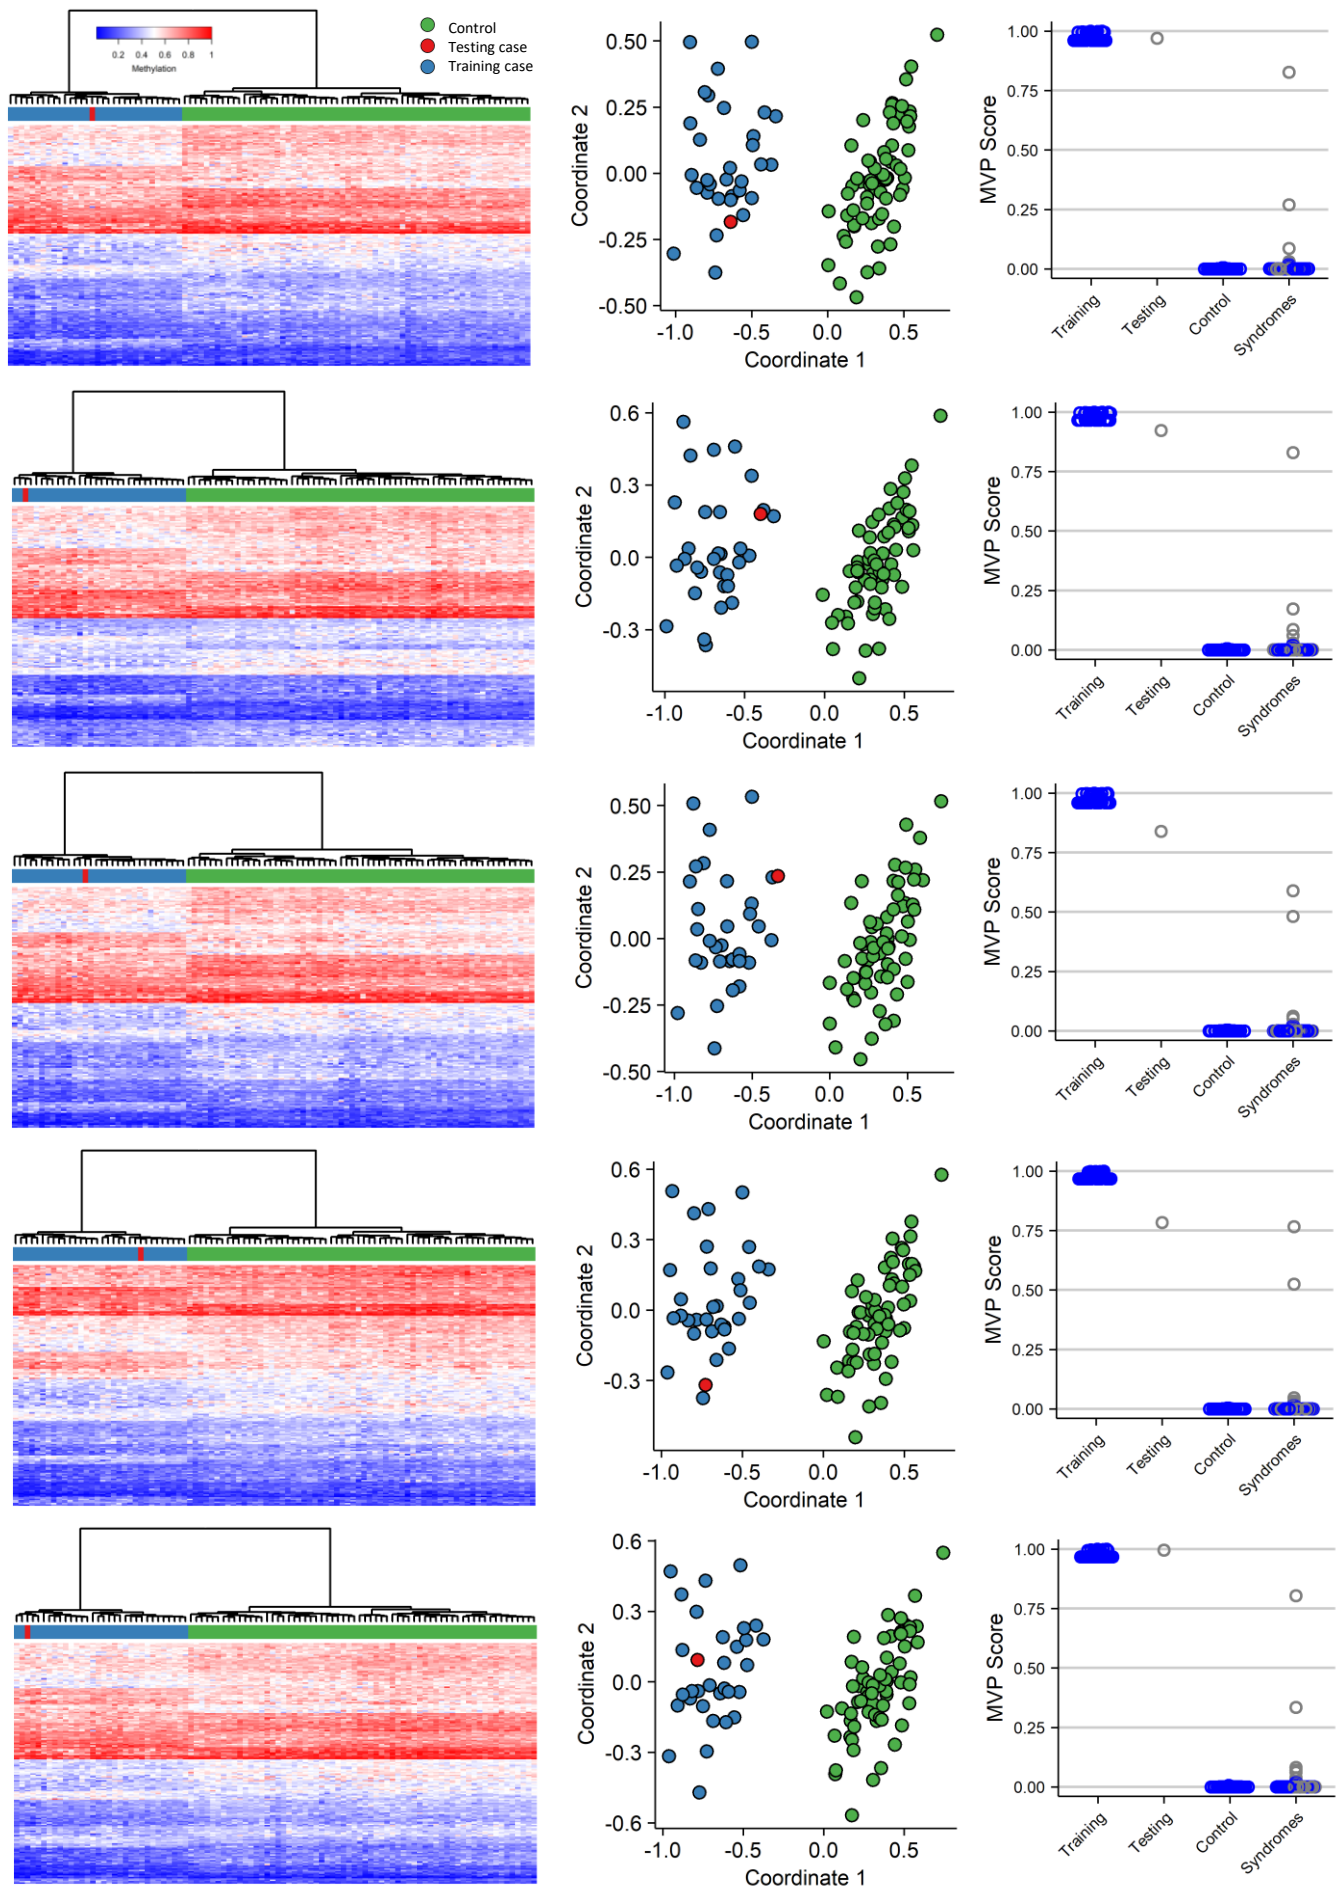



Supplementary Figure 3: Leave-1-out cross validation results

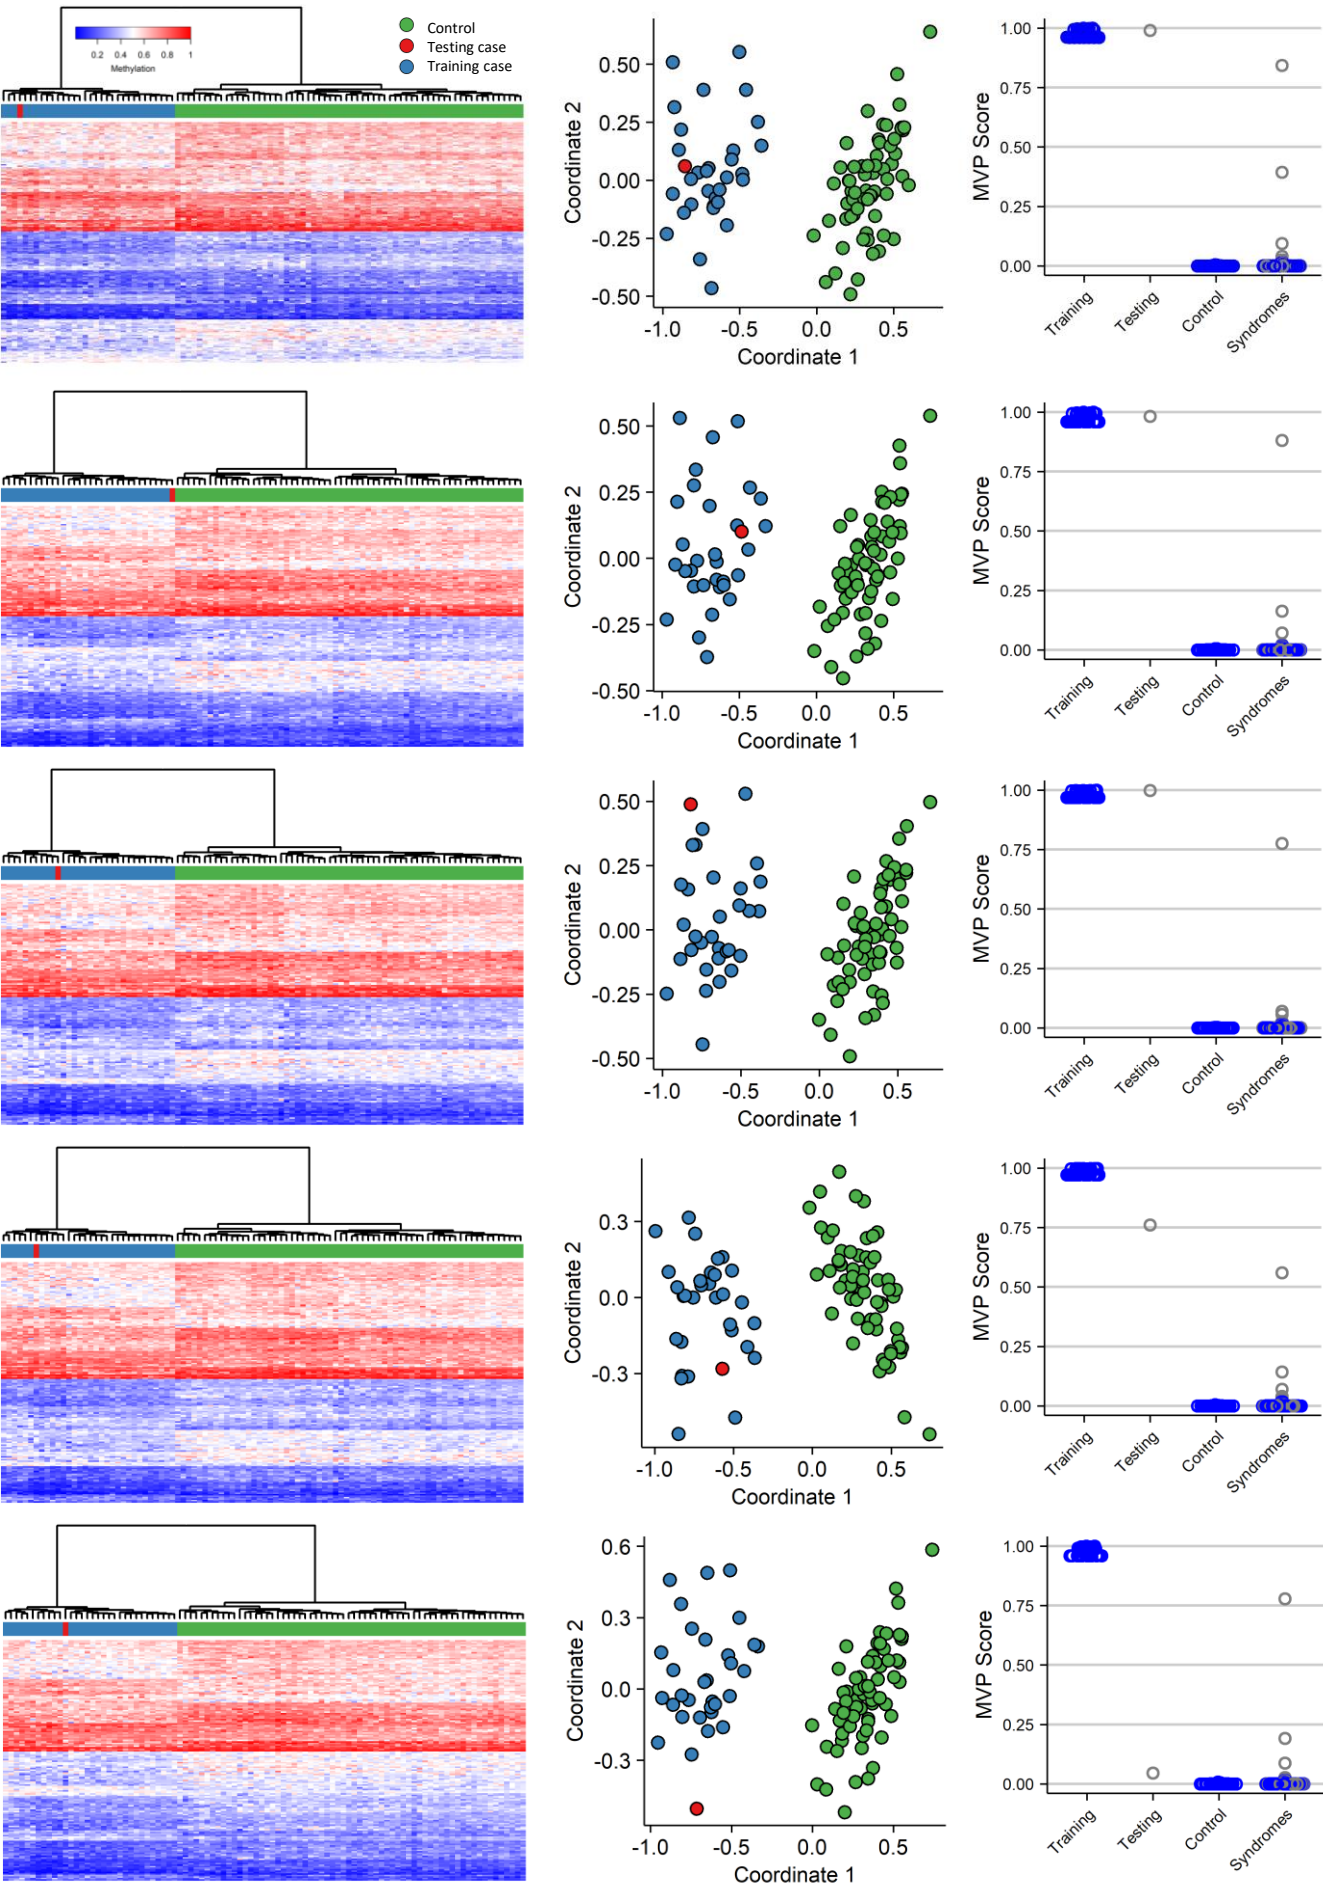

Supplementary Figure 3: Leave-1-out cross validation results

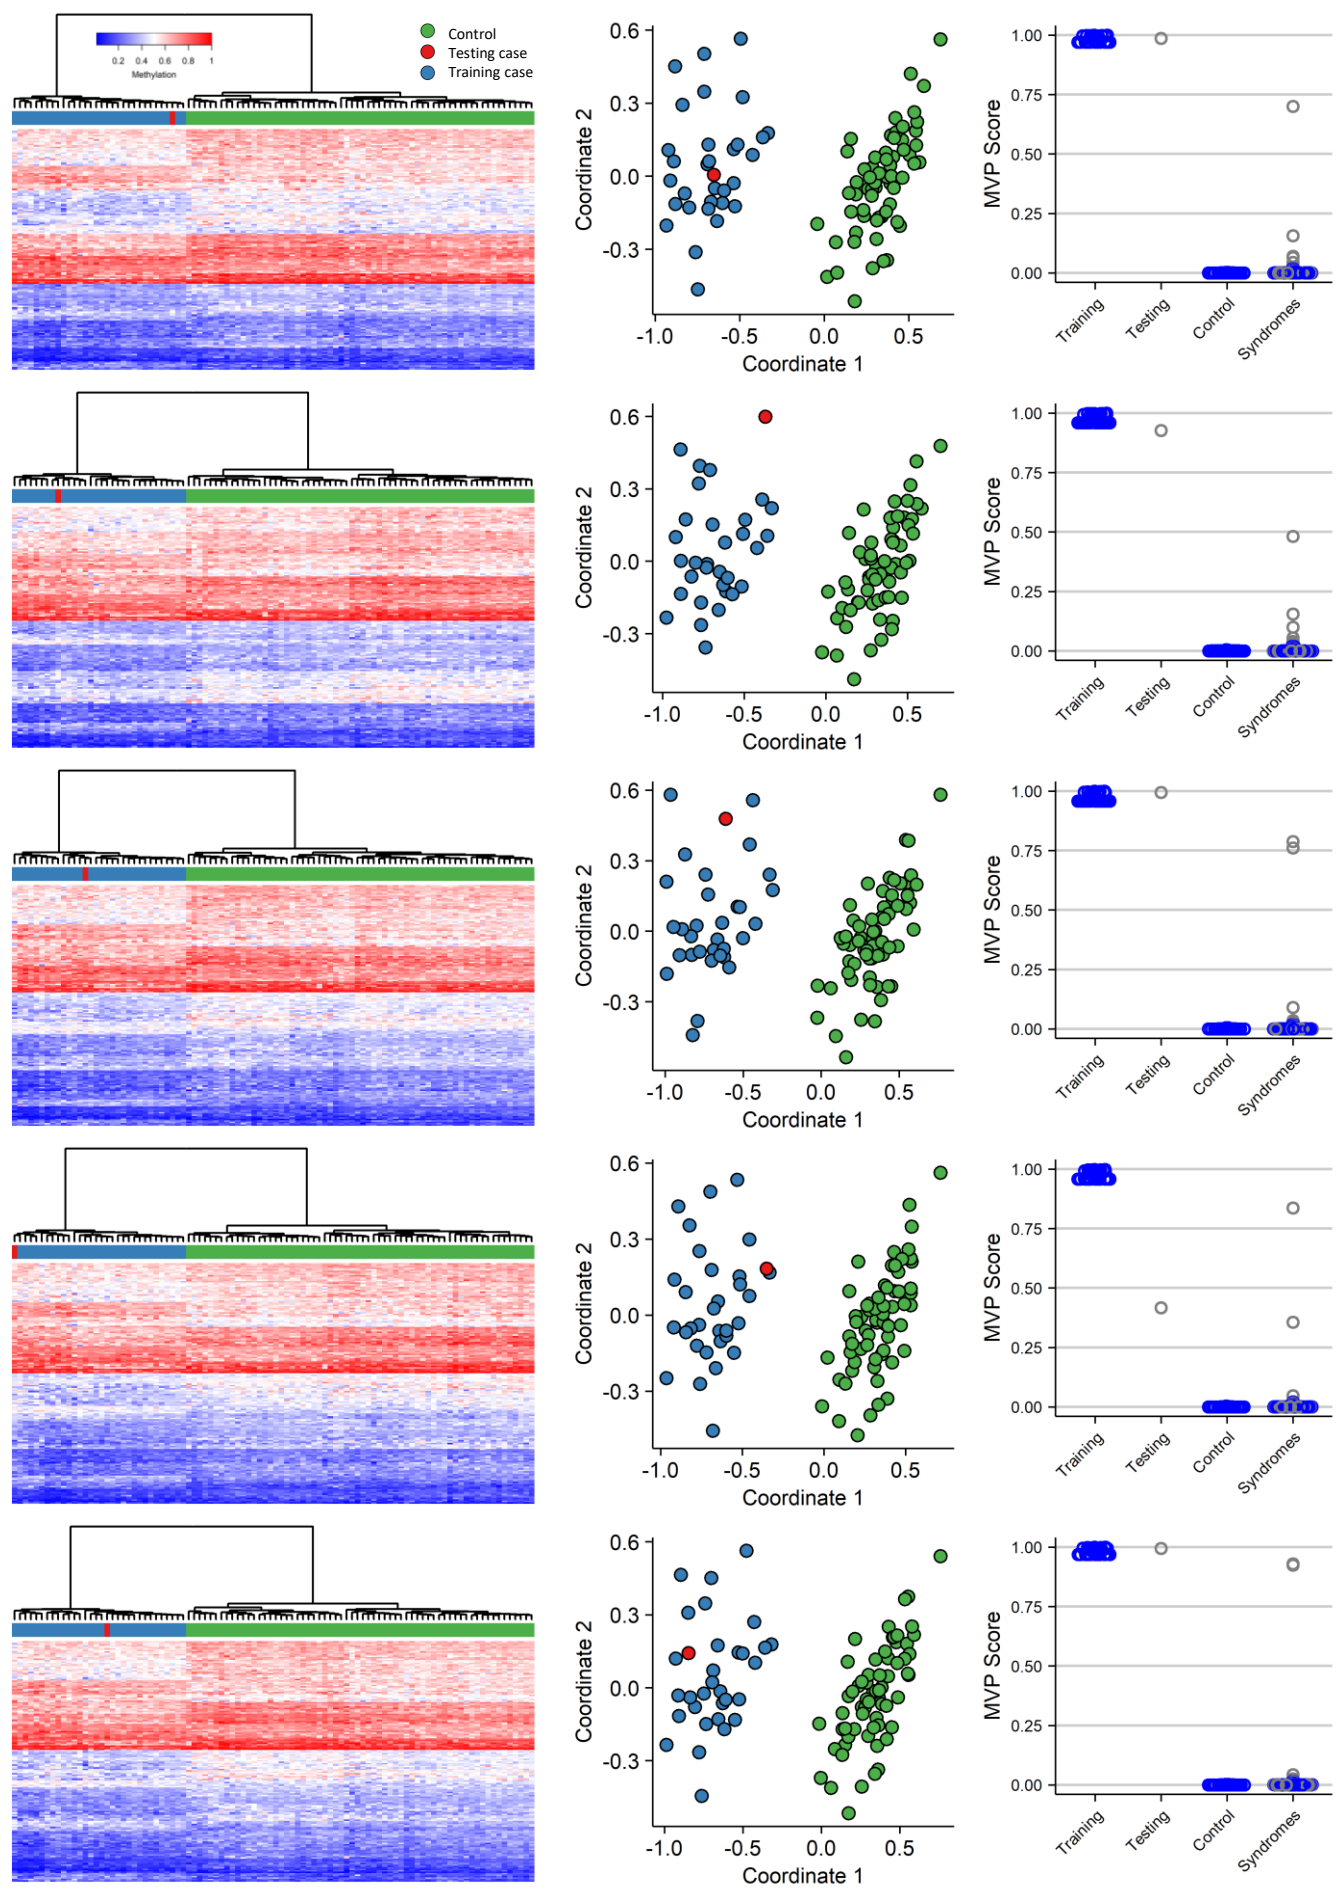

## Supplementary Figure 3: Leave-1-out cross validation results

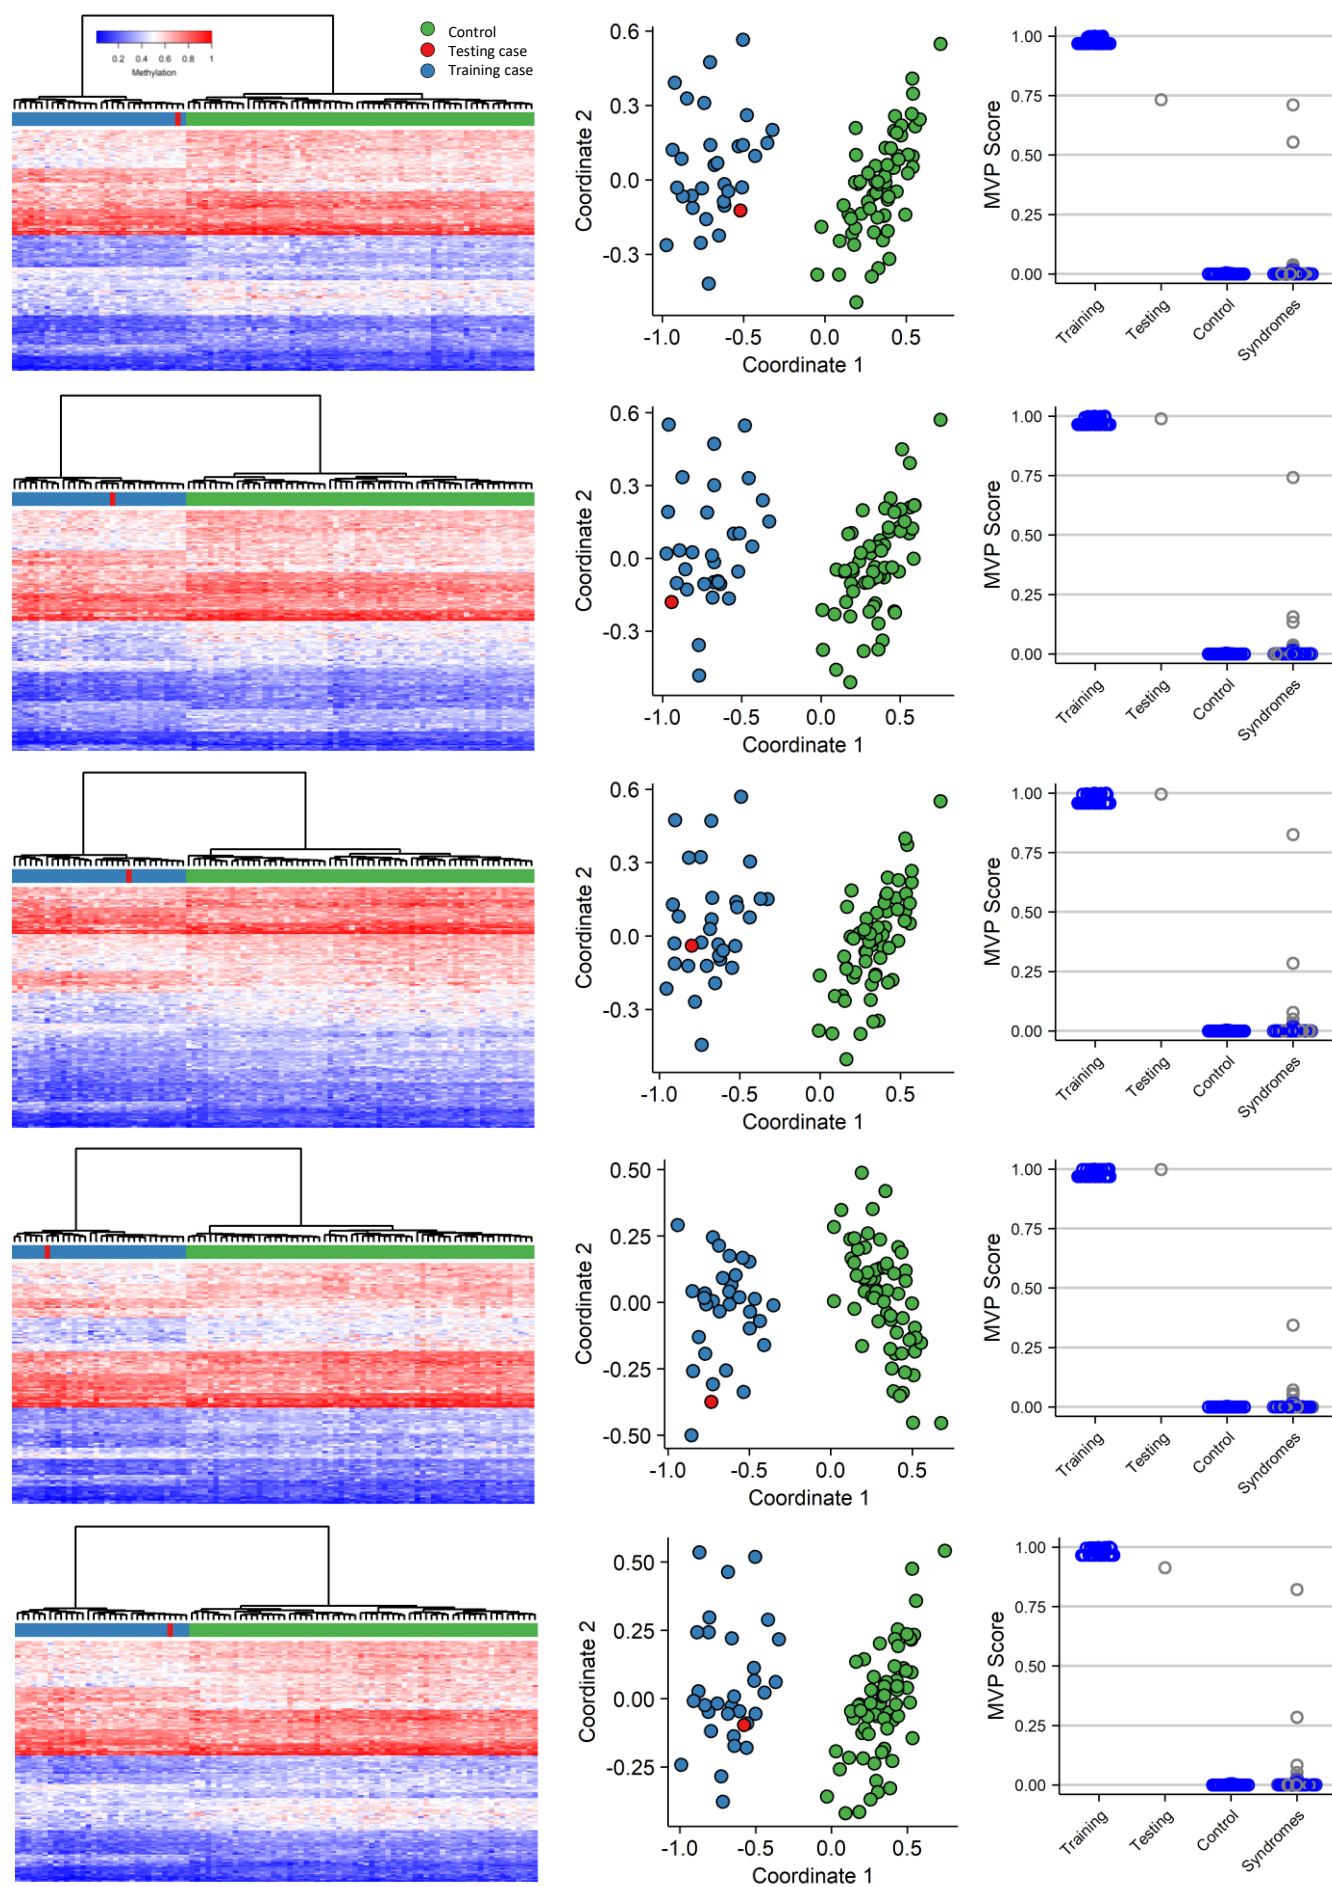

Supplementary Figure 3: Leave-1-out cross validation results

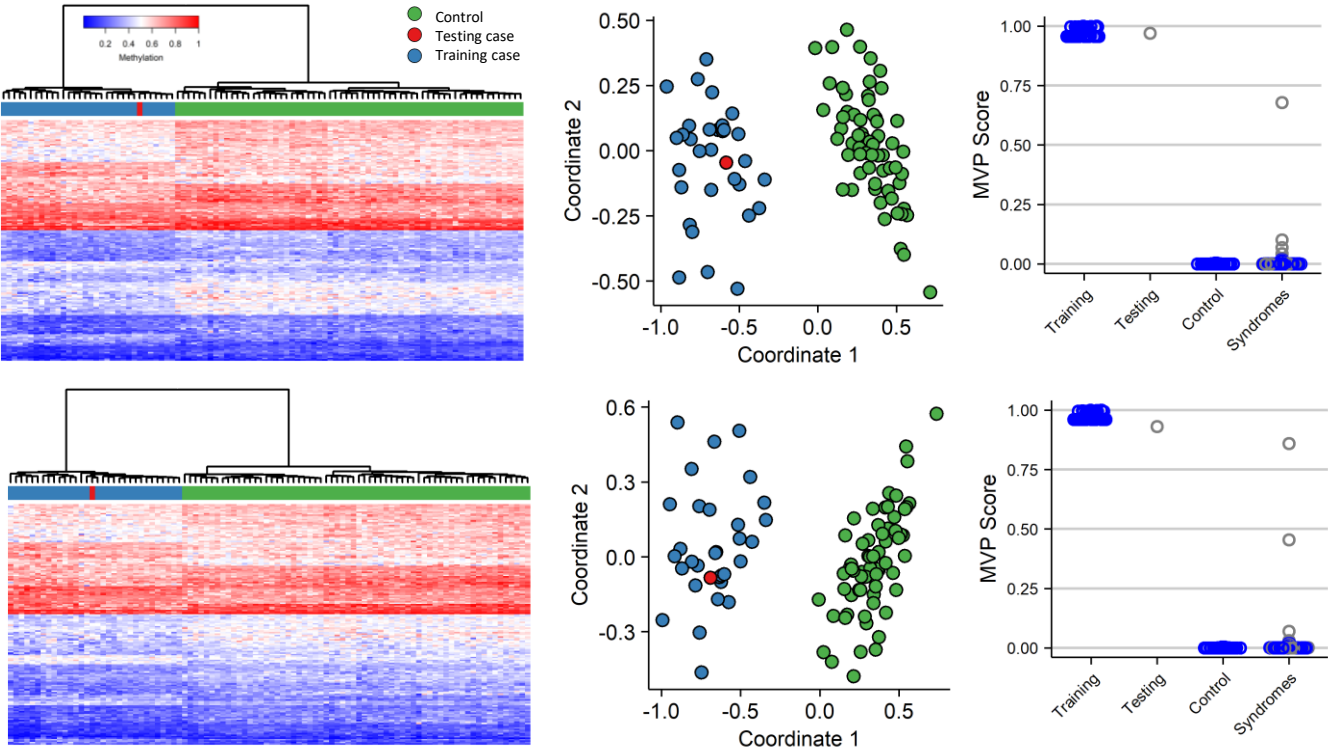



## Supplementary Figure 4: Leave-25%-out cross validation results

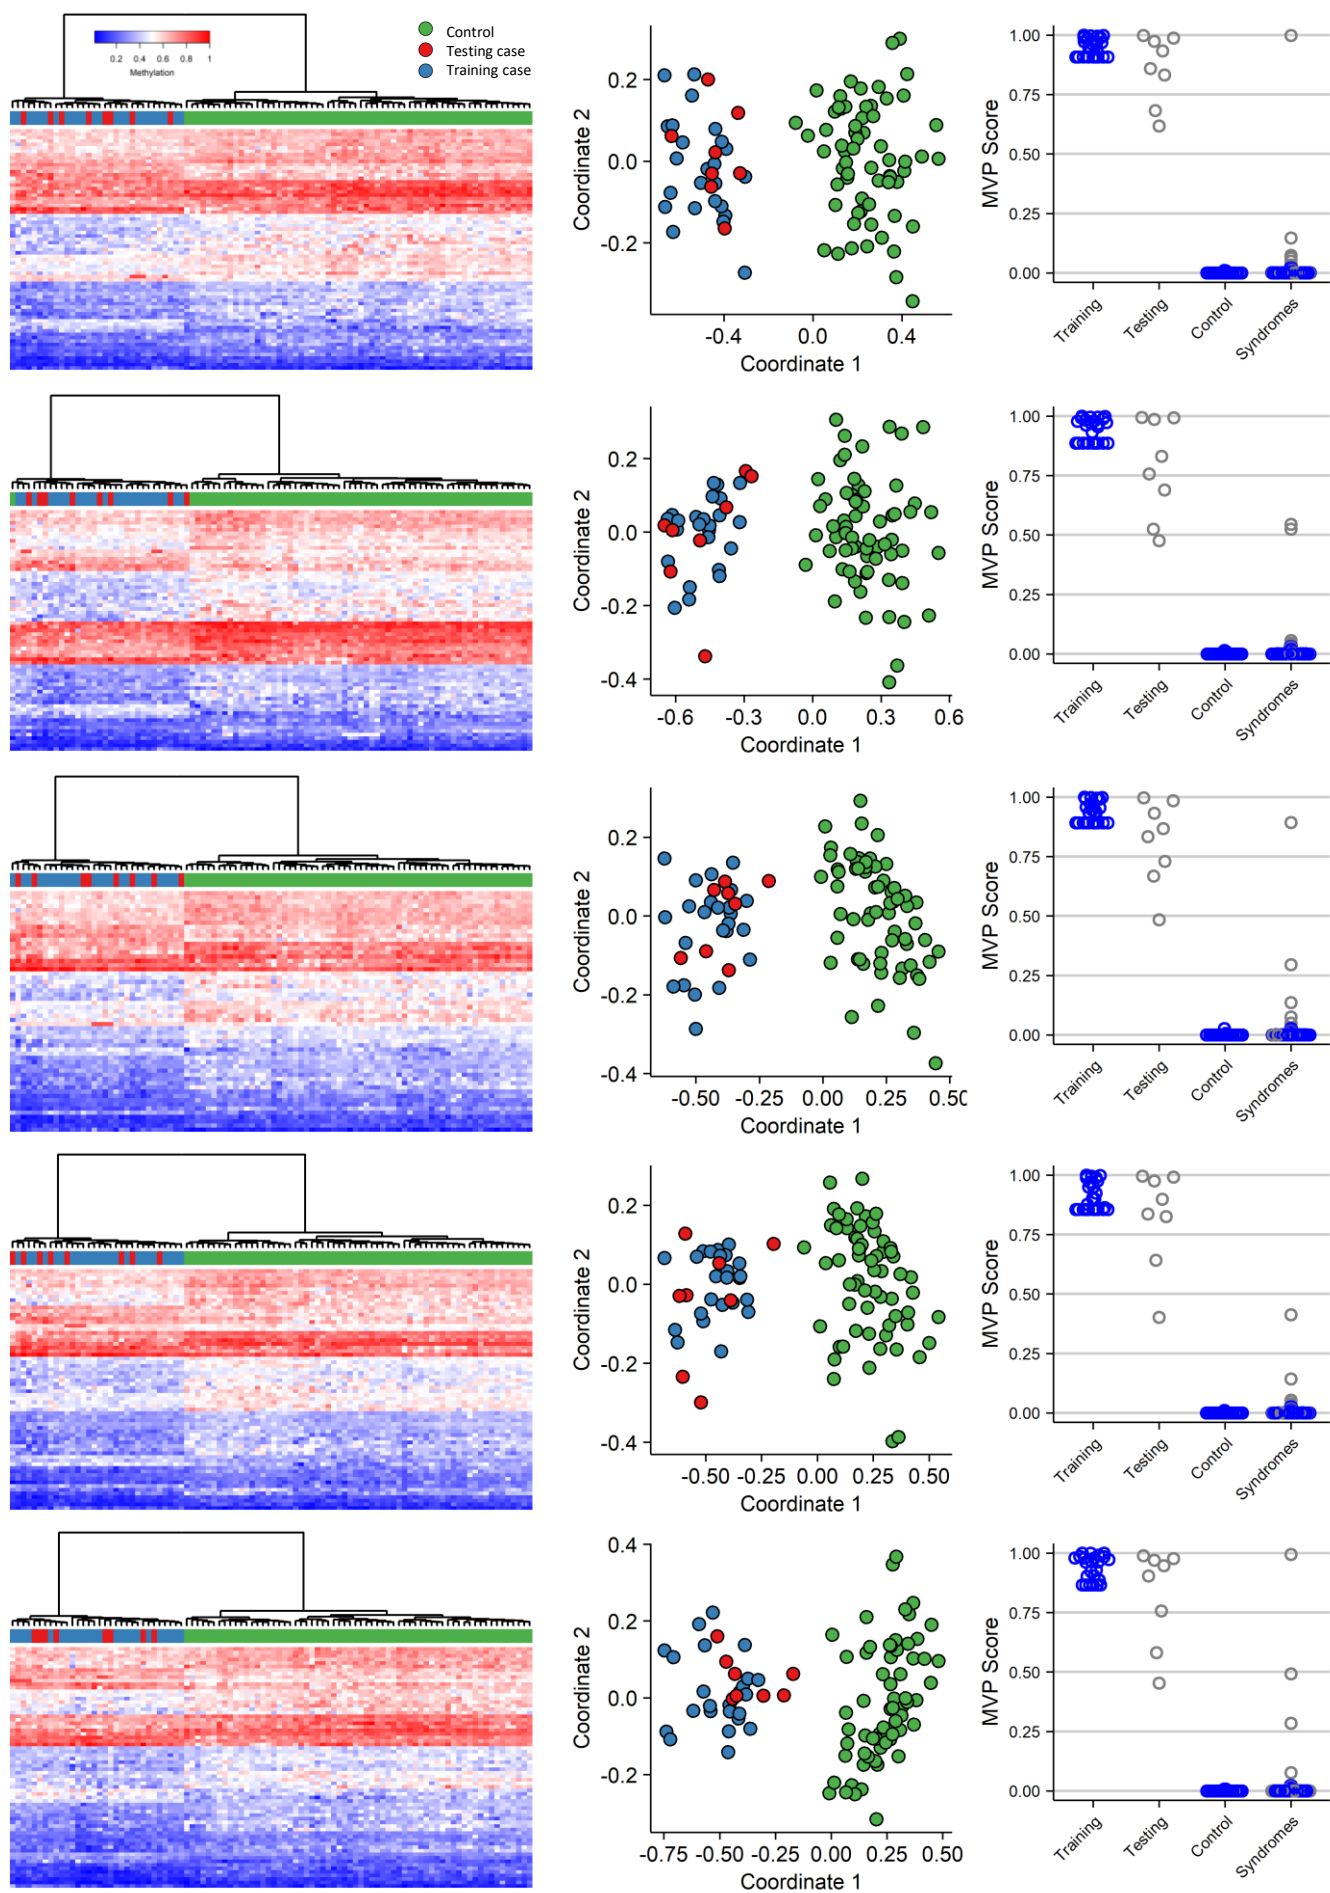



## Supplementary Figure 4: Leave-25%-out cross validation results

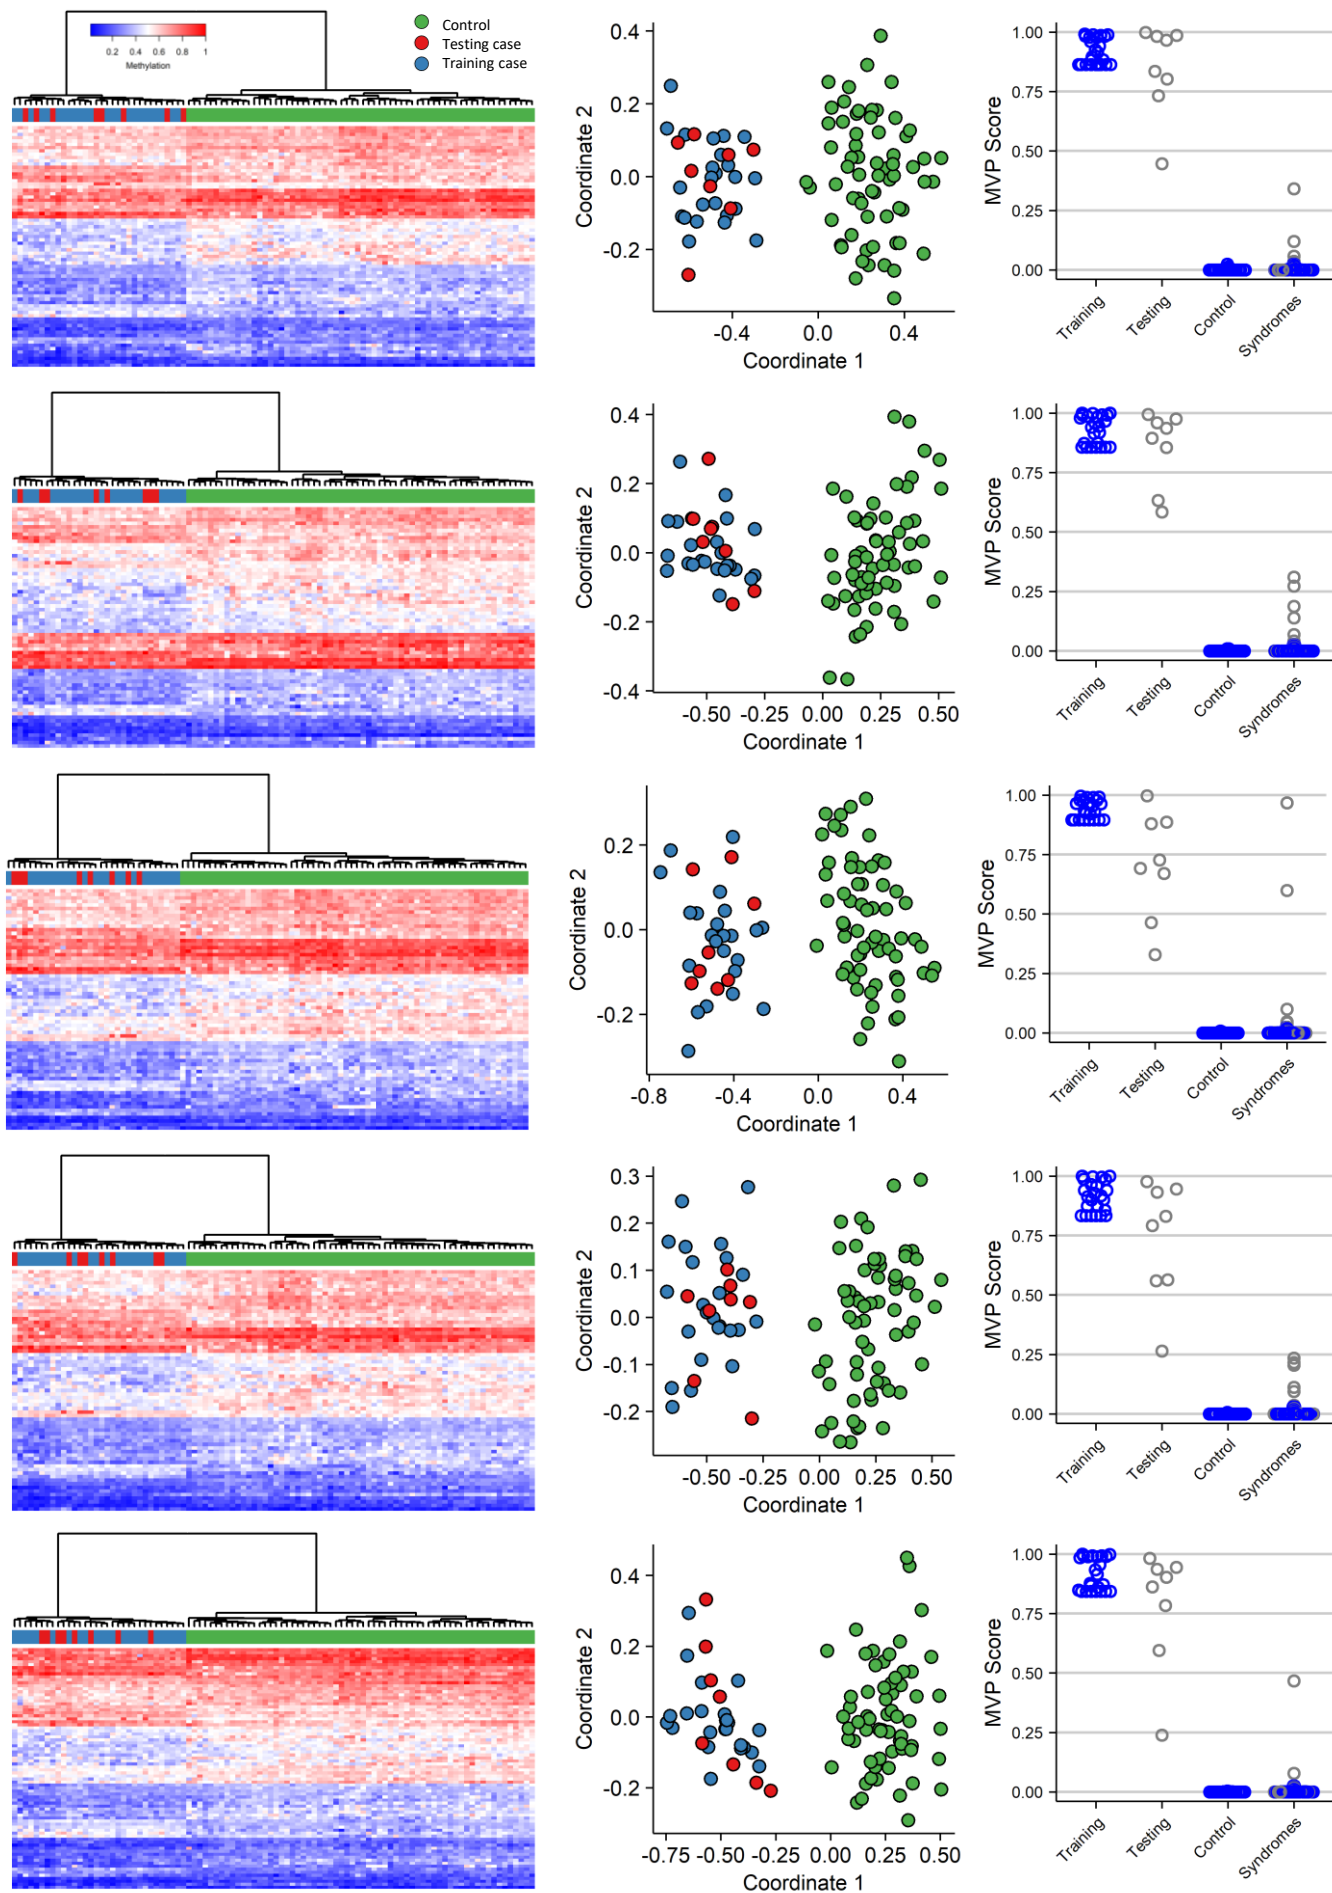

## Supplementary Figure 4: Leave-25%-out cross validation results

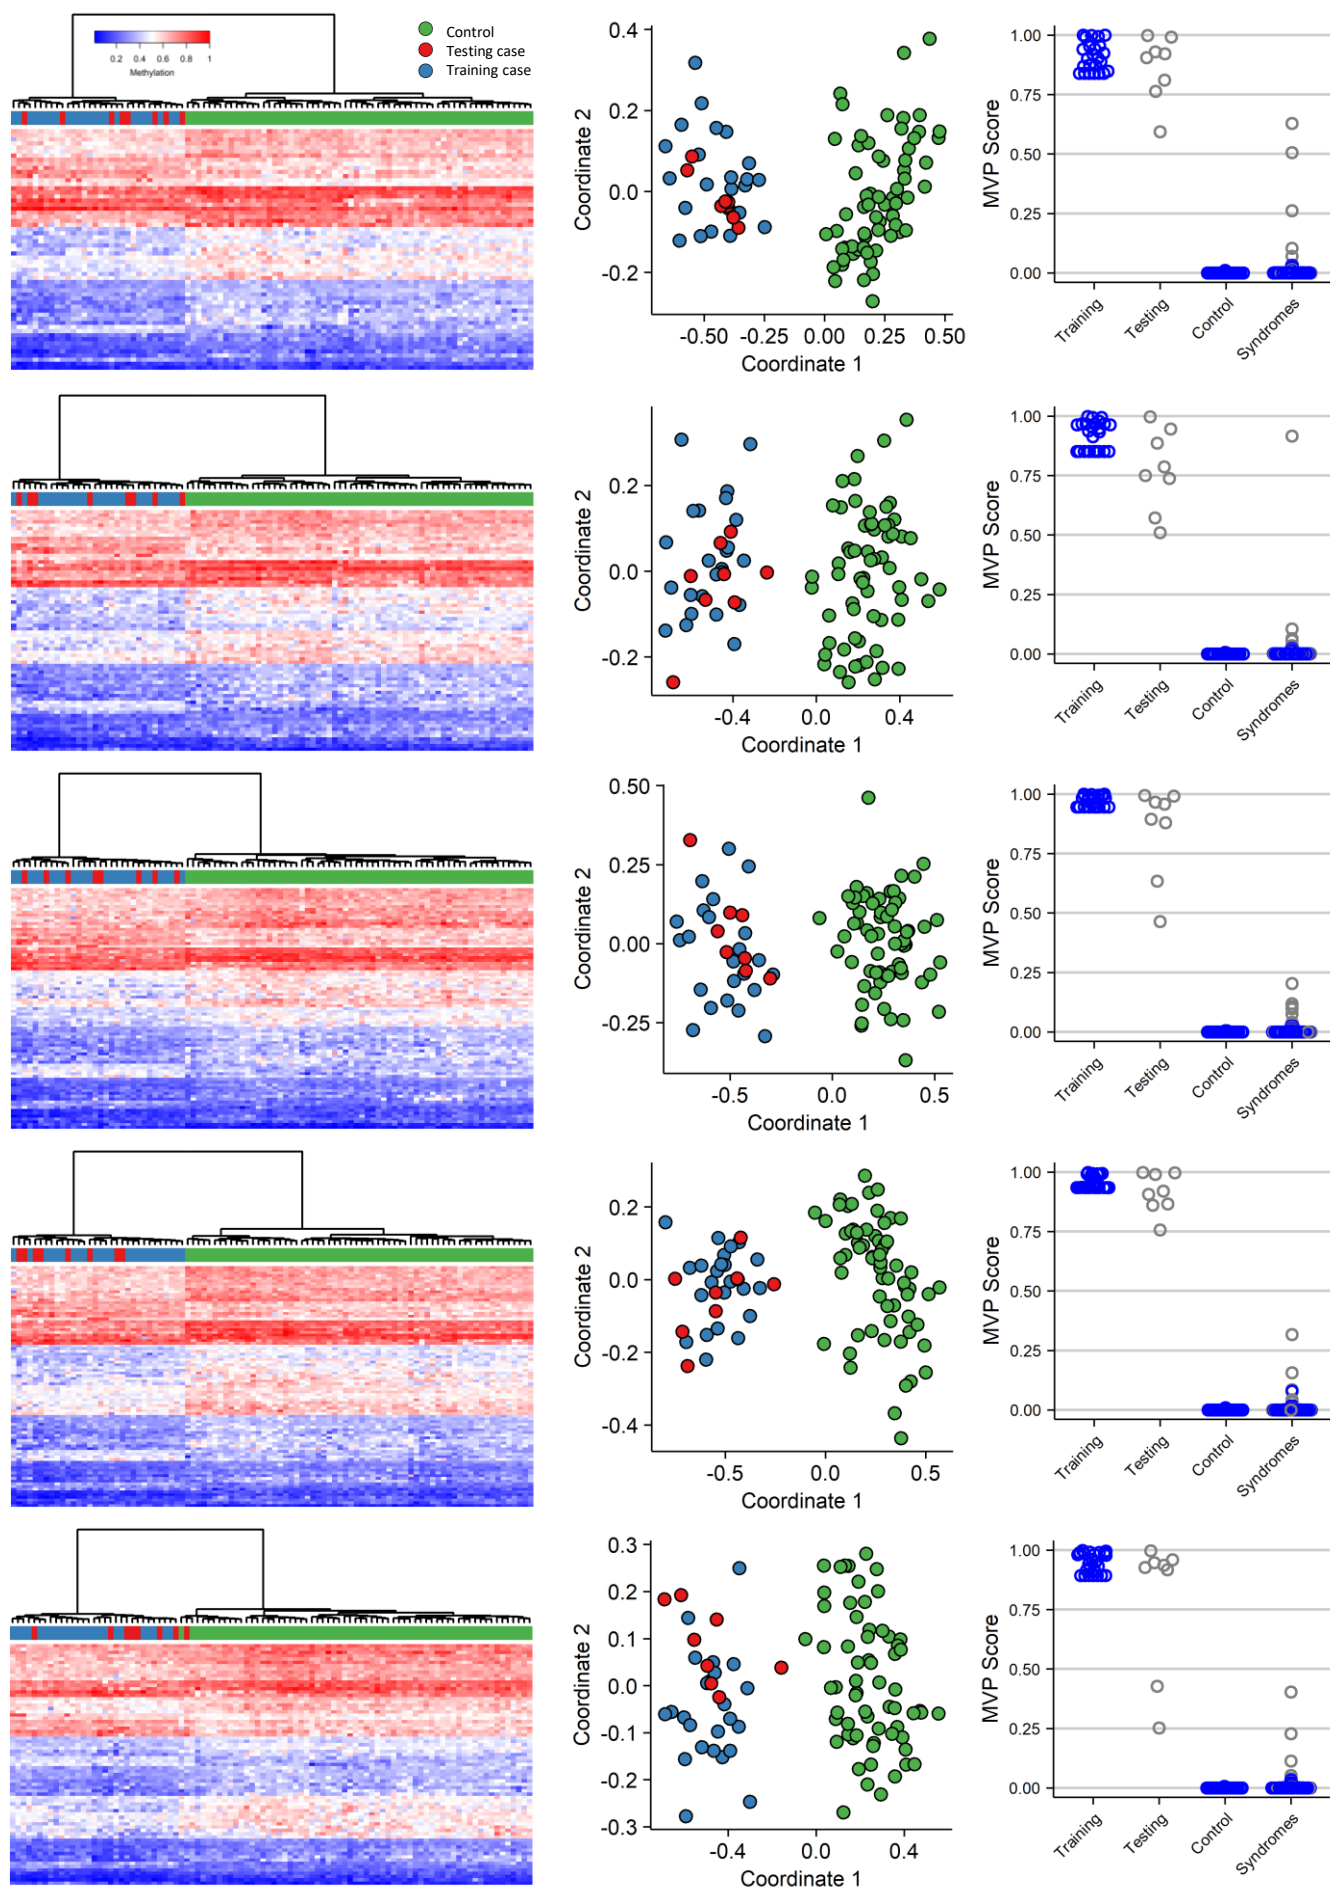

Supplementary Figure 4: Leave-25%-out cross validation results

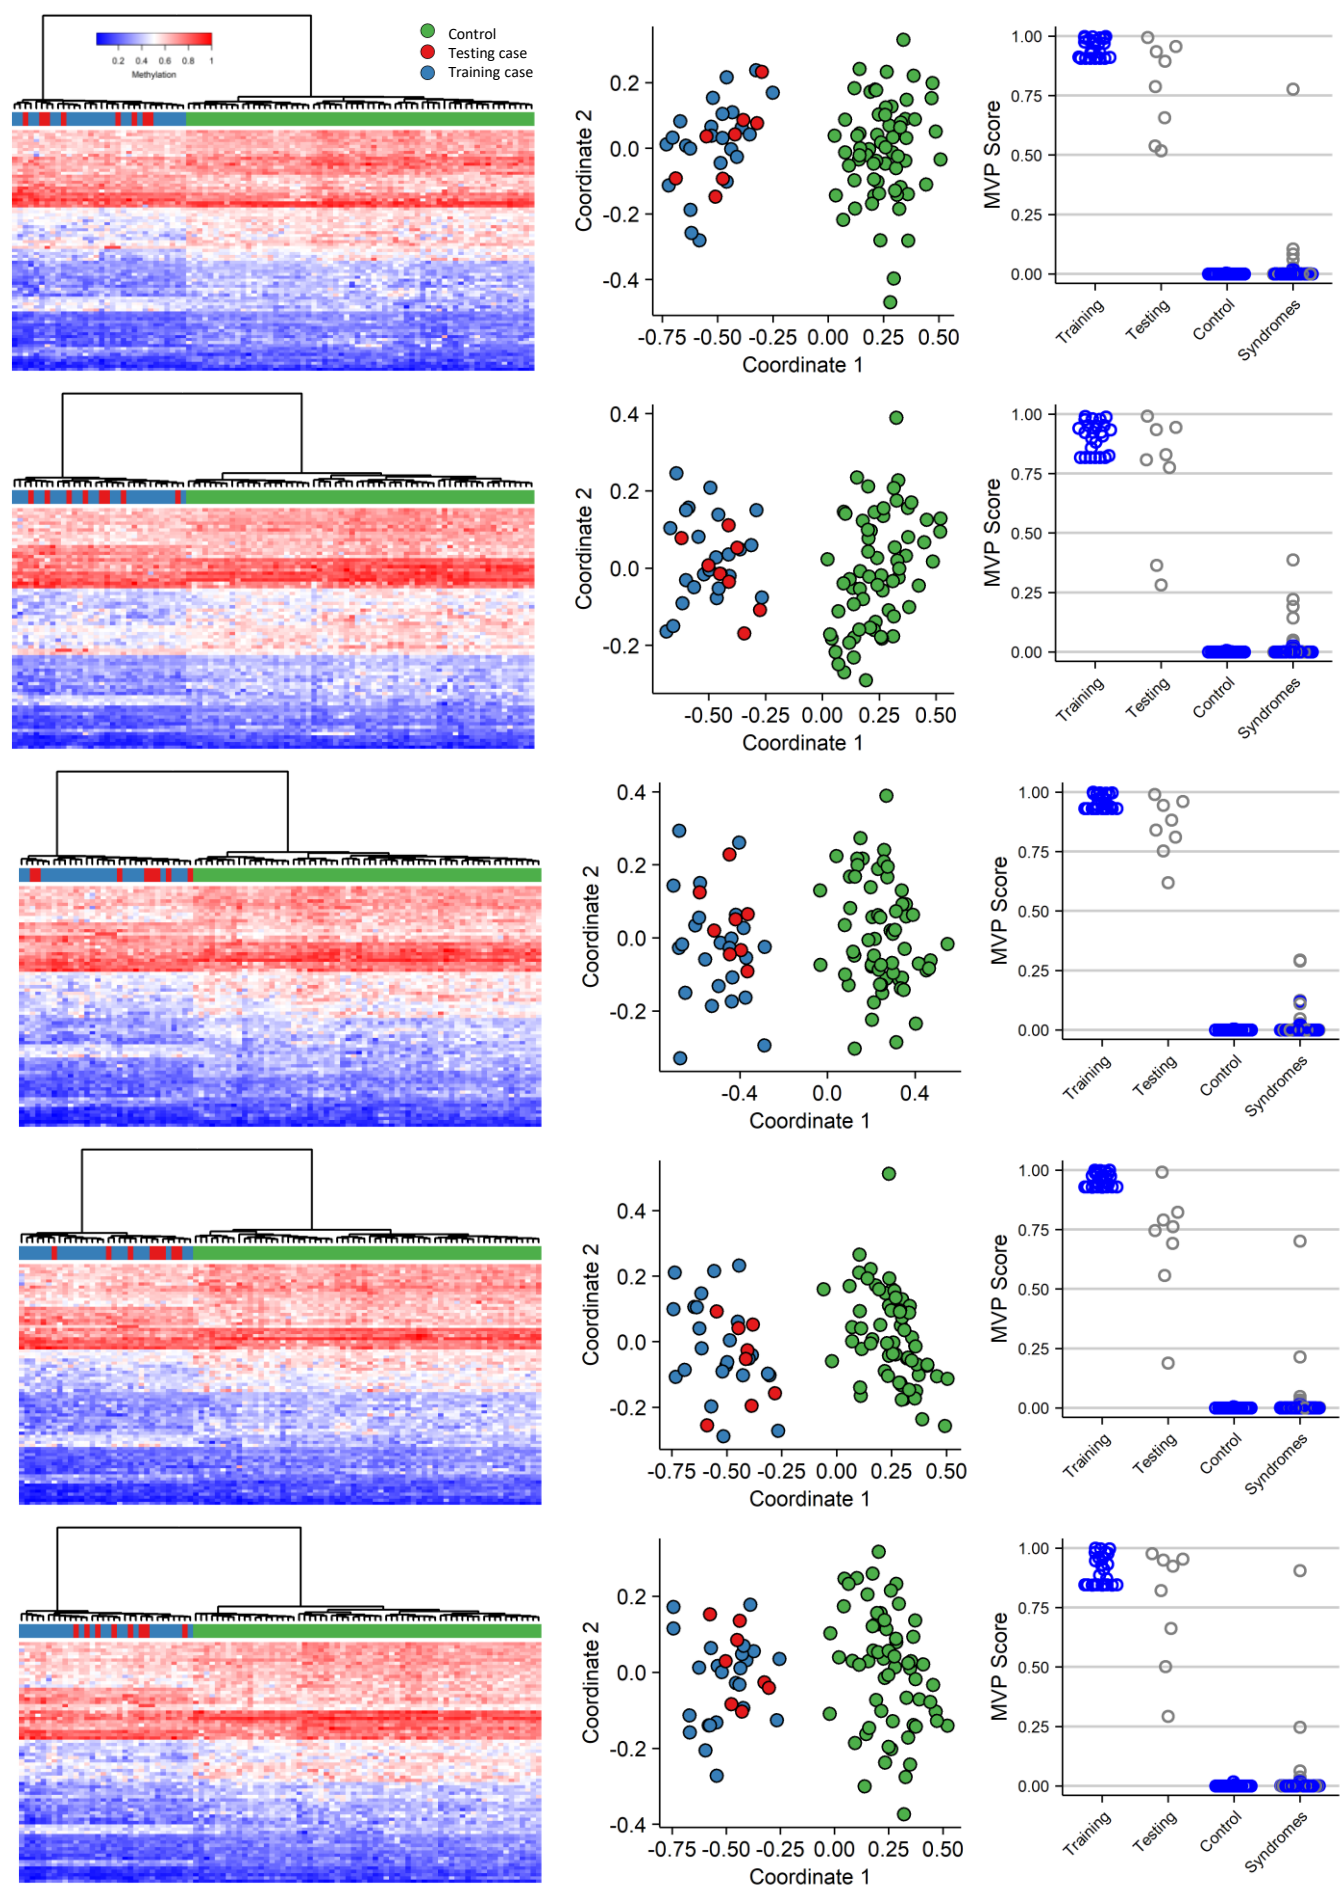

Supplement: s1 [file s1]
