# Supplementary material for: Identification of a DNA Methylation Episignature in the 22q11.2 Deletion Syndrome
Source: MDPI journal article supplement (doi:10.3390/ijms22168611), 2021-08-10
Supplement: s1 [file s1]

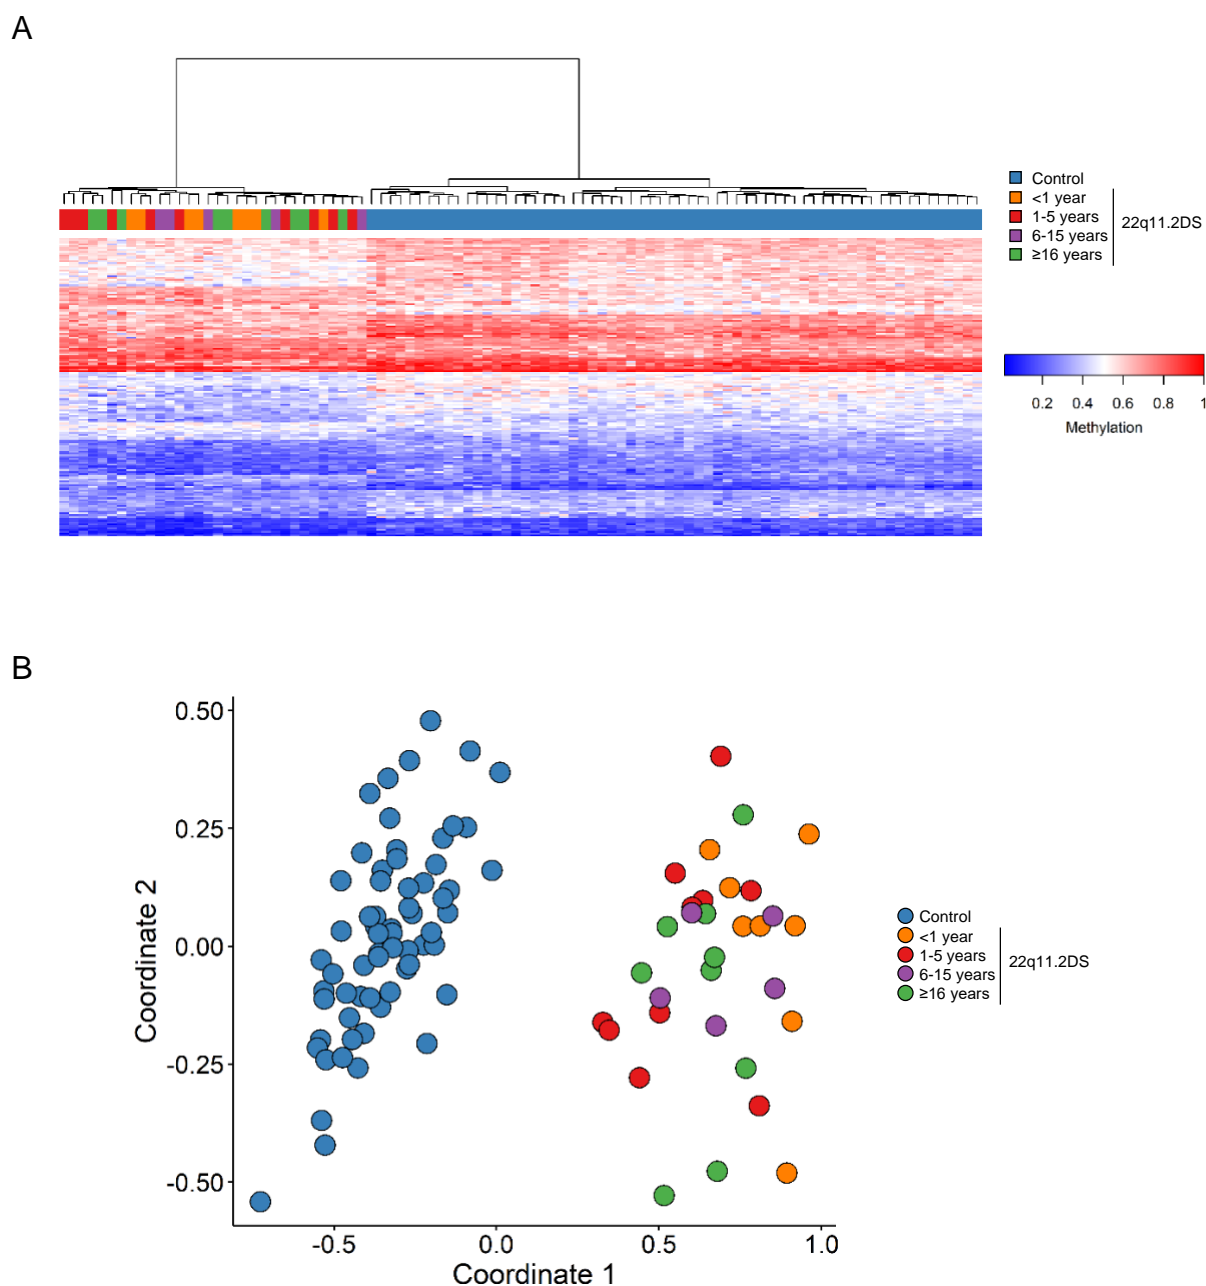

**Supplementary Figure 1:** Unsupervised clustering of 22q11.2DS and control samples coloured by age. **A.** Hierarchical clustering. Each row represents one microarray probe each column represents one sample. **B.** Multidimensional scaling.

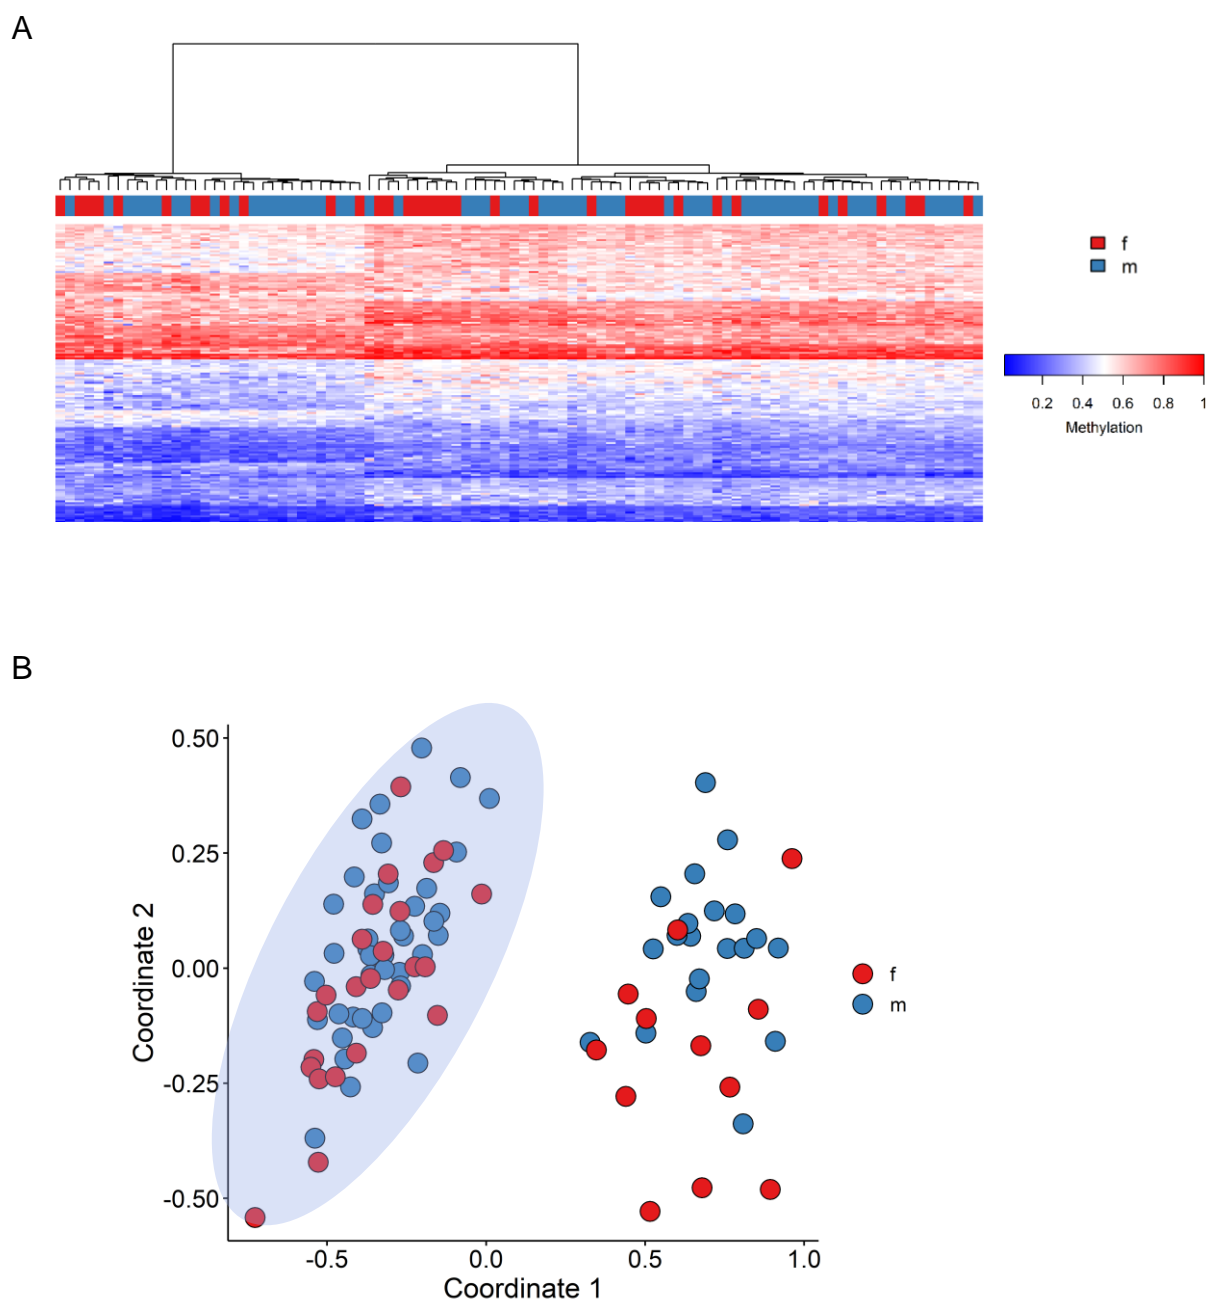

**Supplementary Figure 2:** Unsupervised clustering of 22q11.2DS and control samples coloured by sex. **A.** Hierarchical clustering. Each row represents one microarray probe each column represents one sample. **B.** Multidimensional scaling, controls encircled in blue.
